# Supplementary material for: mRNA-delivery of IDO1 suppresses T cell-mediated autoimmunity
Source: PubMed Central journal article supplement — Cell Rep Med. 2024 Sep 6;5(9):101717. doi: 10.1016/j.xcrm.2024.101717 (PMC11525033; doi:10.1016/j.xcrm.2024.101717), 2024-09-06
Supplement: mmc1.pdf [file mmc1.pdf]

**Cell Reports Medicine, Volume 5**

**Supplemental information**

**mRNA-delivery of IDO1 suppresses**

**T cell-mediated autoimmunity**

**Laurie L. Kenney, Rebecca Suet-Yan Chiu, Michelle N. Dutra, Alexandra Wactor, Chris Honan, Lukas Shelerud, Joshua J. Corrigan, Kelly Yu, Joseph D. Ferrari, Kate L. Jeffrey, Eric Huang, and Paul L. Stein**

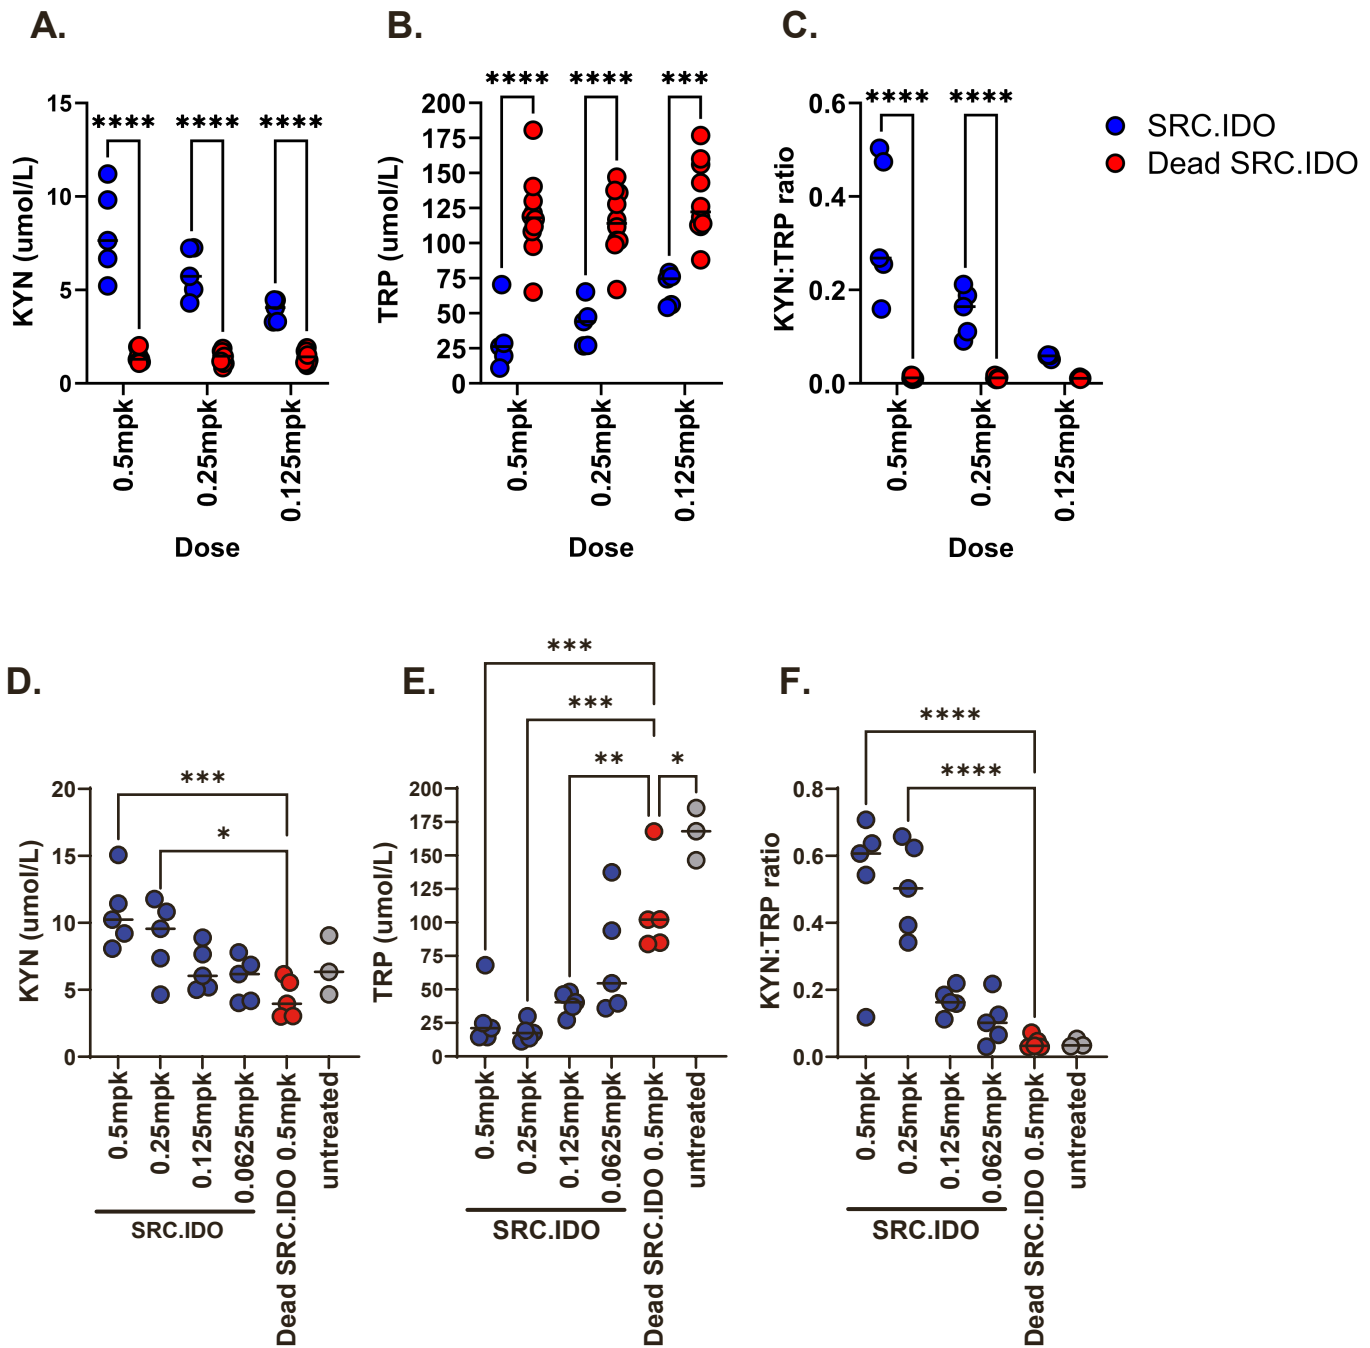

**Supplemental Figure 1. Engineered IDO1 induces dose-dependent changes in serum TRP and KYN in mouse and rat. Related to Fig 2.** (A–C) Naïve C57BL/6 mice were injected i.v. with 0.5, 0.25, or 0.125 mg/kg of LNP A-formulated mRNA. Serum (A) KYN, (B) TRP, and (C) KYN:TRP ratios were determined at 72 h by ELISA. Significance was determined by one-way ANOVA compared with Dead SRC.IDO controls with secondary Sidak’s multiple comparisons test. \*\*\*\* $p < 0.0001$ . (D–F) Naïve Sprague Dawley rats were injected i.v. with 0.5, 0.25, 0.125 or 0.0625 mg/kg of LNP A-formulated mRNA and plasma (D) KYN, (E) TRP, and (F) KYN:TRP ratios were determined at 72 h by ELISA. Data are individual rats and medians of  $n=3-5$  animals/group and representative of 2 similar experiments. Significance was determined by one-way ANOVA compared with Dead SRC.IDO controls with secondary Dunnett’s multiple comparisons test. \* $p < 0.05$ , \*\* $p < 0.005$ , \*\*\* $p < 0.001$ , \*\*\*\* $p < 0.0001$ .

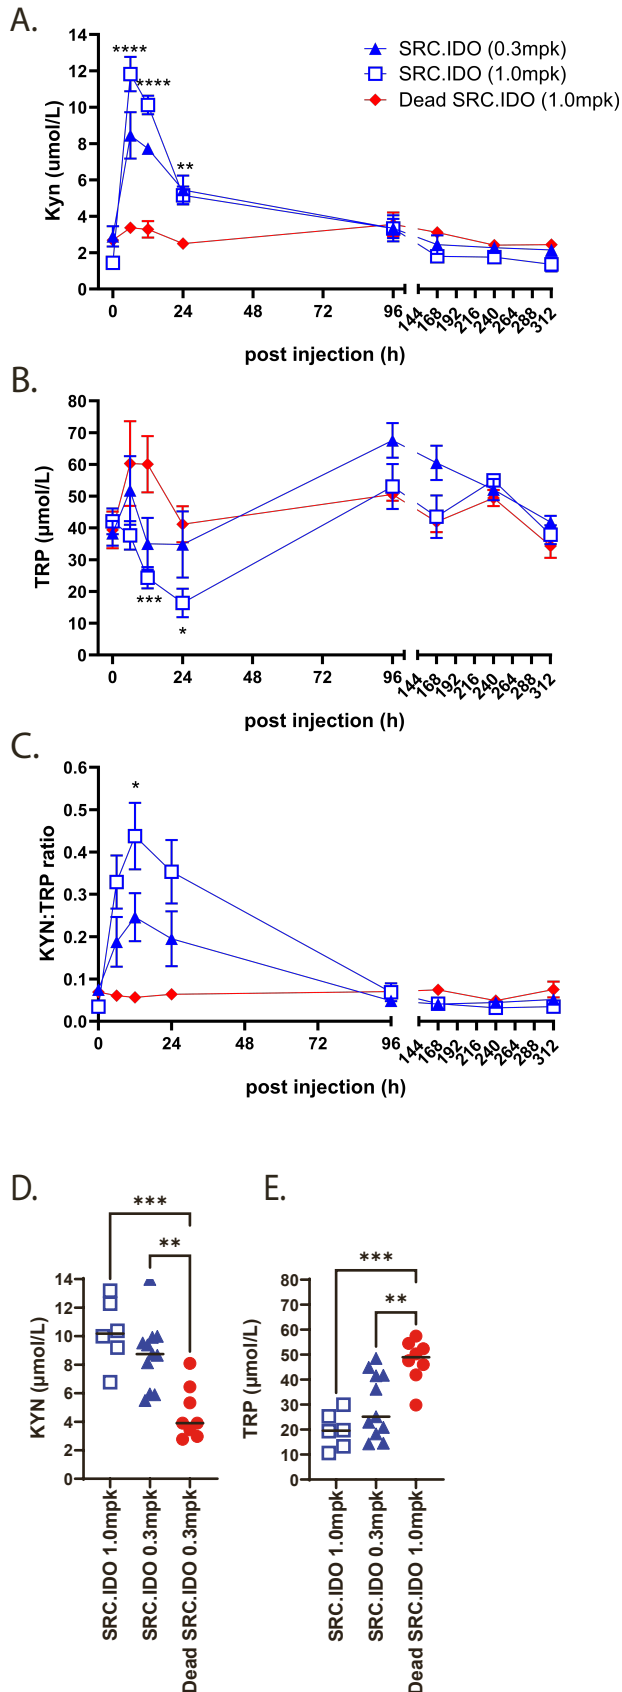

**Supplemental Figure 2. mRNA-delivered anchored IDO1 is bioactive in NHP. Related to Fig 2. (A, B)** NHP were infused over 60 mins along with 0.3 or 1.0 mg/kg of LNP B-formulated mRNA. Blood samples were obtained at 6, 12, 24, 96, 168, 240, and 312 h post-injection. (A) KYN and (B) TRP were measured in the serum by ELISA. N=3 NHP/group. Data are mean and s.e.m. and are representative of similar experiments. Significance was determined by two-way ANOVA compared with Dead SRC.IDO controls using Dunnett's multiple comparisons tests. \* $p < 0.05$ , \*\* $p < 0.005$ , \*\*\* $p < 0.0005$ , \*\*\*\* $p < 0.0001$ . (C & D) (C) KYN levels at 6 h and (D) TRP levels at 24 h post-injection determined by ELISA from serum. N=5–11 NHP/group. Data are individual NHP and median and are pooled from 3 similar experiments. Significance was determined by one-way ANOVA compared with Dead SRC.IDO controls using Dunnett's multiple comparisons tests. \*\* $p < 0.005$ , \*\*\* $p < 0.0005$ .

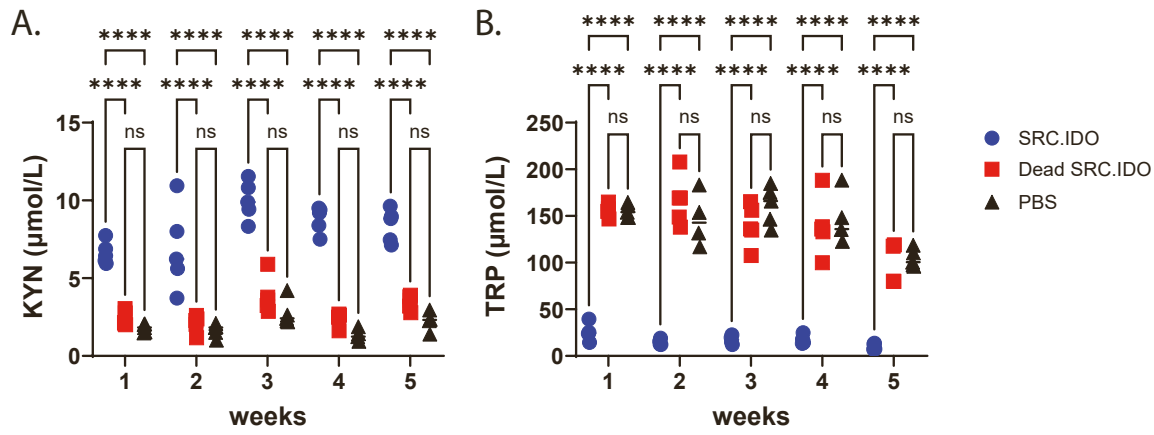

**Supplemental Figure 3. In vivo function is sustained with repeat dosing of SRC.IDO. Related to Fig 2.** Naïve C57BL/6 mice were injected i.v. with 0.5 mg/kg of LNP A-formulated mRNA every 7 days for 5 weeks. Serum (A) KYN and (B) TRP were determined at 24 h post each administration by ELISA. Significance was determined by two-way ANOVA with Tukey's multiple comparisons test. \*\*\*\* $p < 0.0001$ . Data are individual mice and medians of 3-5 mice/groups and representative of 2 similar experiments.

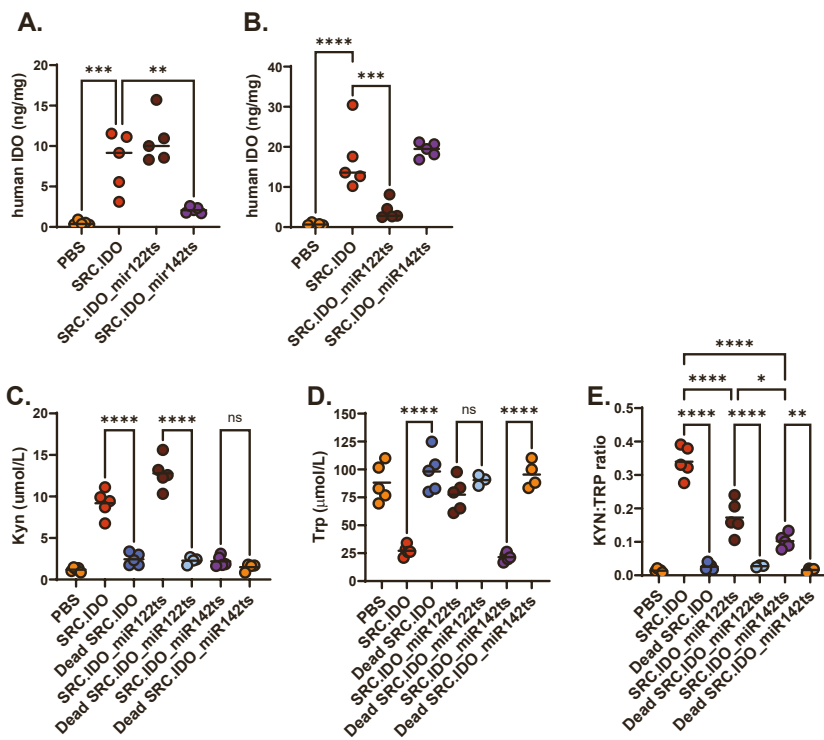

**Supplemental Figure 4. Protein expression and changes in metabolite levels in SRC.IDO\_miR122ts- and SRC.IDO\_miR142ts-treated mice. Related to Fig 6.** Naïve C57BL/6 mice were injected i.v. with 0.5 mg/kg of LNP A-formulated mRNA. Human IDO1 protein expression in (A) spleen and (B) liver lysates was determined at 24 h by ELISA. Significance was determined by one-way ANOVA compared to SRC.IDO with Dunnett's multiple comparisons. \*\* $p < 0.005$ , \*\*\* $p < 0.0005$ , \*\*\*\* $p < 0.0001$ . Serum (C) KYN, (D) TRP and (E) KYN:TRP ratio were determined at 24 h by ELISA. Significance was determined by one-way ANOVA with Tukey's multiple comparisons. \* $p < 0.05$ , \*\* $p < 0.005$ , \*\*\*\* $p < 0.0001$ . Data are individual mice and medians of 5 mice/groups and representative of 4 similar experiments.

**Supplemental Table 2. Lists the antibodies used for the flowcytometry analysis used for aGVHD studies, related to the Flowcytometry for aGVHD section of the STAR Methods.**

| Color         | Antigen   | Clone     | Company        | Order number | Dilution |
|---------------|-----------|-----------|----------------|--------------|----------|
| APC-eFluor780 | Viability | n/a       | Invitrogen     | 65-0865-14   | 1:5000   |
| BUV805        | CD3       | 145-2C11  | BD biosciences | 749276       | 1:400    |
| BV785         | CD4       | GK1.5     | Biolegend      | 100453       | 1:400    |
| BUV737        | CD8       | 53-6.7    | BD Biosciences | 612759       | 1:400    |
| AF700         | CD19      | 6D5       | Biolegend      | 115528       | 1:800    |
| PE            | H2-Kd     | SF1-1.1.1 | Invitrogen     | 12-5957-82   | 1:400    |
| BV421         | H2-Kb     | AF6-88.5  | Biolegend      | 116525       | 1:400    |
| AF647         | FoxP3     | 150D      | Biolegend      | 320014       | 1:200    |
| BV605         | Ki67      | 16A8      | Biolegend      | 652413       | 1:200    |
| FITC          | Caspase-3 | C92-605   | BD Biosciences | 559341       | 1:500    |
